# Supplementary material for: WNT/β-Catenin Directs Self-Renewal Symmetric Cell Division of hTERThigh Prostate Cancer Stem Cells
Source: Oxford University Press journal article supplement (doi:10.1158/0008-5472.can-16-1887), 2017-02-16
Supplement: 00085472can161887-sup-168871_2_supp_3818928_njltwn.docx [file 00085472can161887-sup-168871_2_supp_3818928_njltwn.docx]

**Supplementary Fig 5**


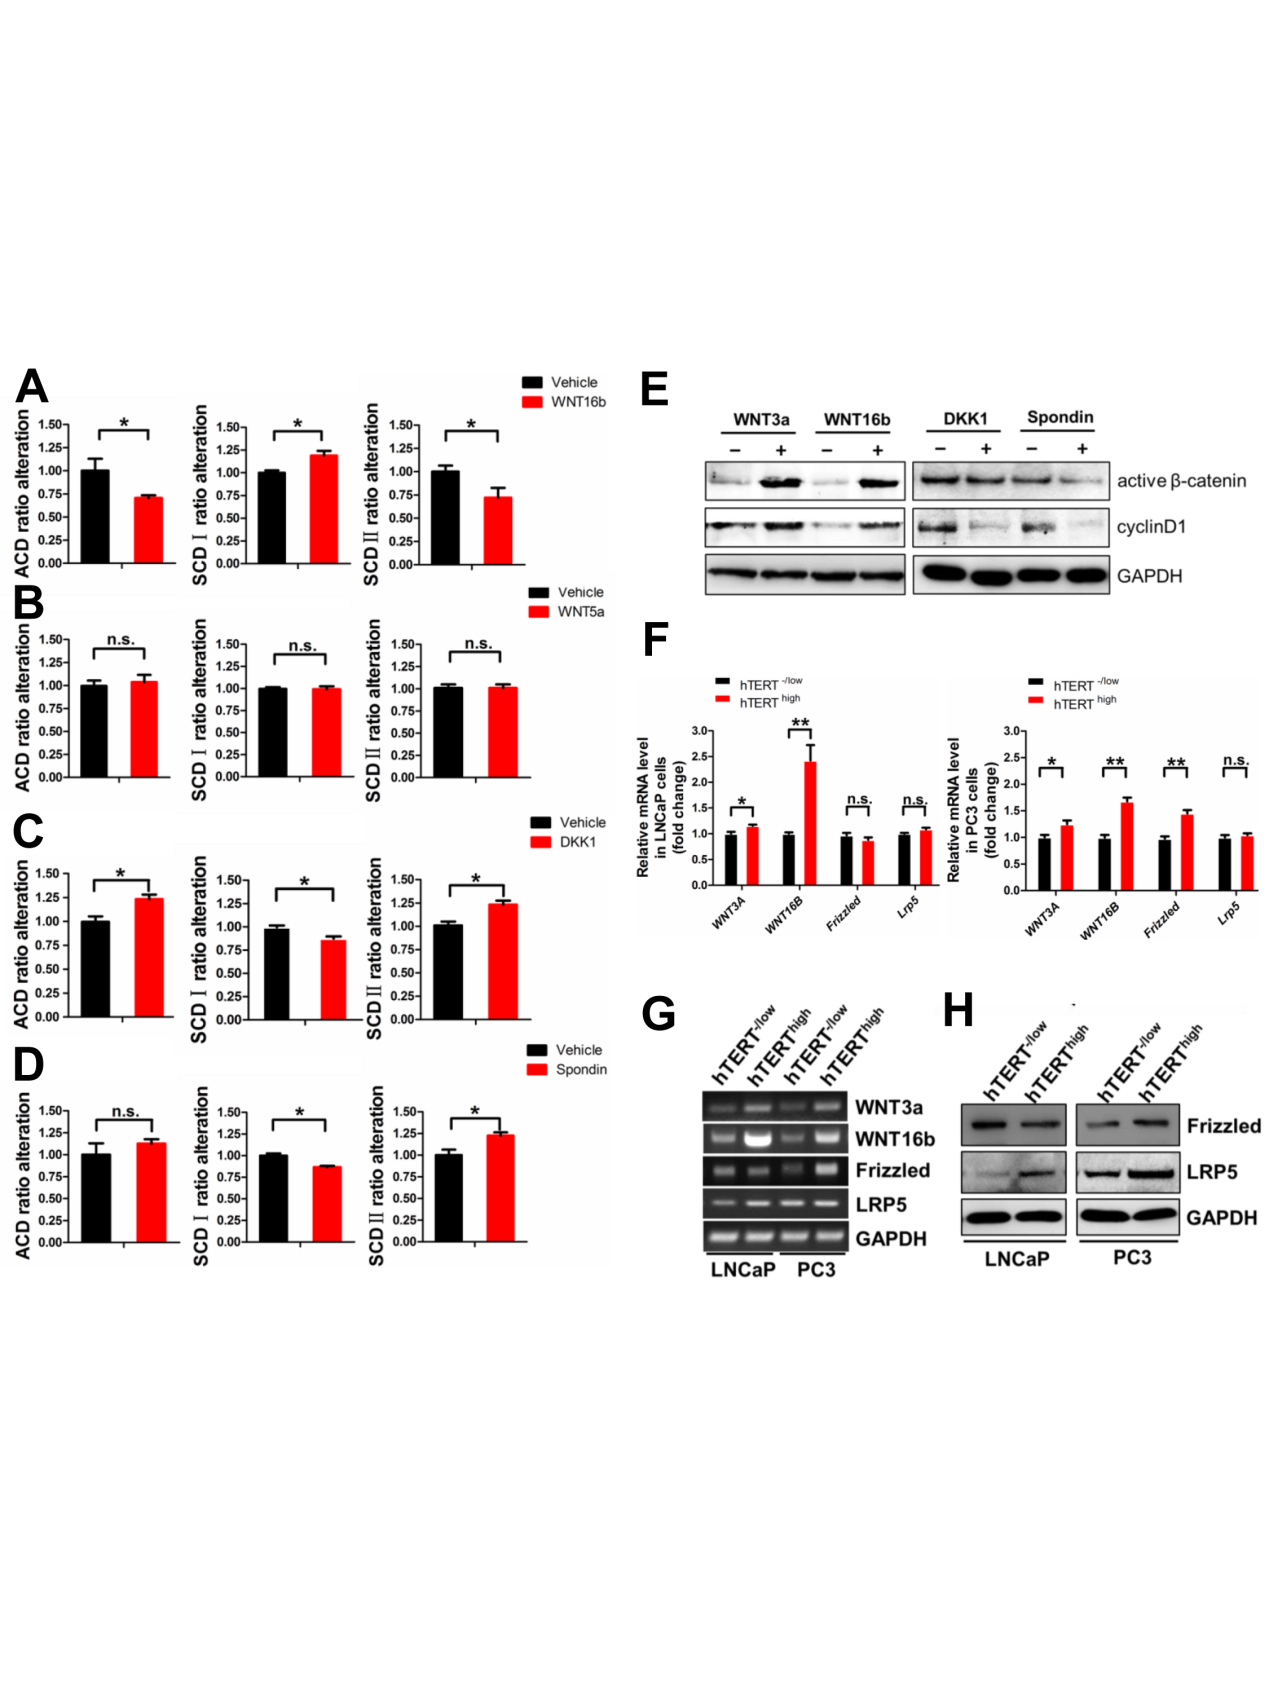


**Supplementary Fig 5. The Effects of WNT ligands and WNT inhibitors on SCD I, SCD II and ACD ratio of hTERThigh LNCaP cells**

(A-D) The effects of WNT16b (A), WNT5a (B), and WNT signaling inhibitors DKK1 (C) and hR-Spondin (D) on the ratio of SCD I, SCD II, and ACD of hTERThigh LNCaP cells were determined using paired cell assays. Cells were treated with 200ng/mL WNT3a, 200ng/mL WNT16b, 50ng/mL DKK1 or 100ng/mL hR-Spondin respectively. The WNT ligands or inhibitors containing medium was replaced every 12 hours. (Student’s *t*-test, *P＜0.05, error bars = s.e.m.. Experiments were repeated three times.) (E) Immunoblotting results show that the treatment of WNT3a or WNT16b up-regulates the expression levels of active β-catenin and WNT signaling targets cyclinD1. Conversely, DKK1 or Spondin strongly suppresses the activation of β-catenin and induction of cyclinD1 expression. (F-H) The expression levels of WNT ligands and receptors including WNT3a, WNT16b, LRP5 and Frizzled in hTERT-/low and hTERThigh PCa cells were determined by qPCR (F and G) and immunoblotting analysis (H) (Student’s *t*-test, **P＜0.01, *P＜0.05, error bars = s.e.m. Experiments were repeated three times.)
