# Supplementary material for: WNT/β-Catenin Directs Self-Renewal Symmetric Cell Division of hTERThigh Prostate Cancer Stem Cells
Source: Oxford University Press journal article supplement (doi:10.1158/0008-5472.can-16-1887), 2017-02-16
Supplement: 00085472can161887-sup-168871_2_supp_3818929_cjltxh.docx [file 00085472can161887-sup-168871_2_supp_3818929_cjltxh.docx]

**Supplementary Fig 6**


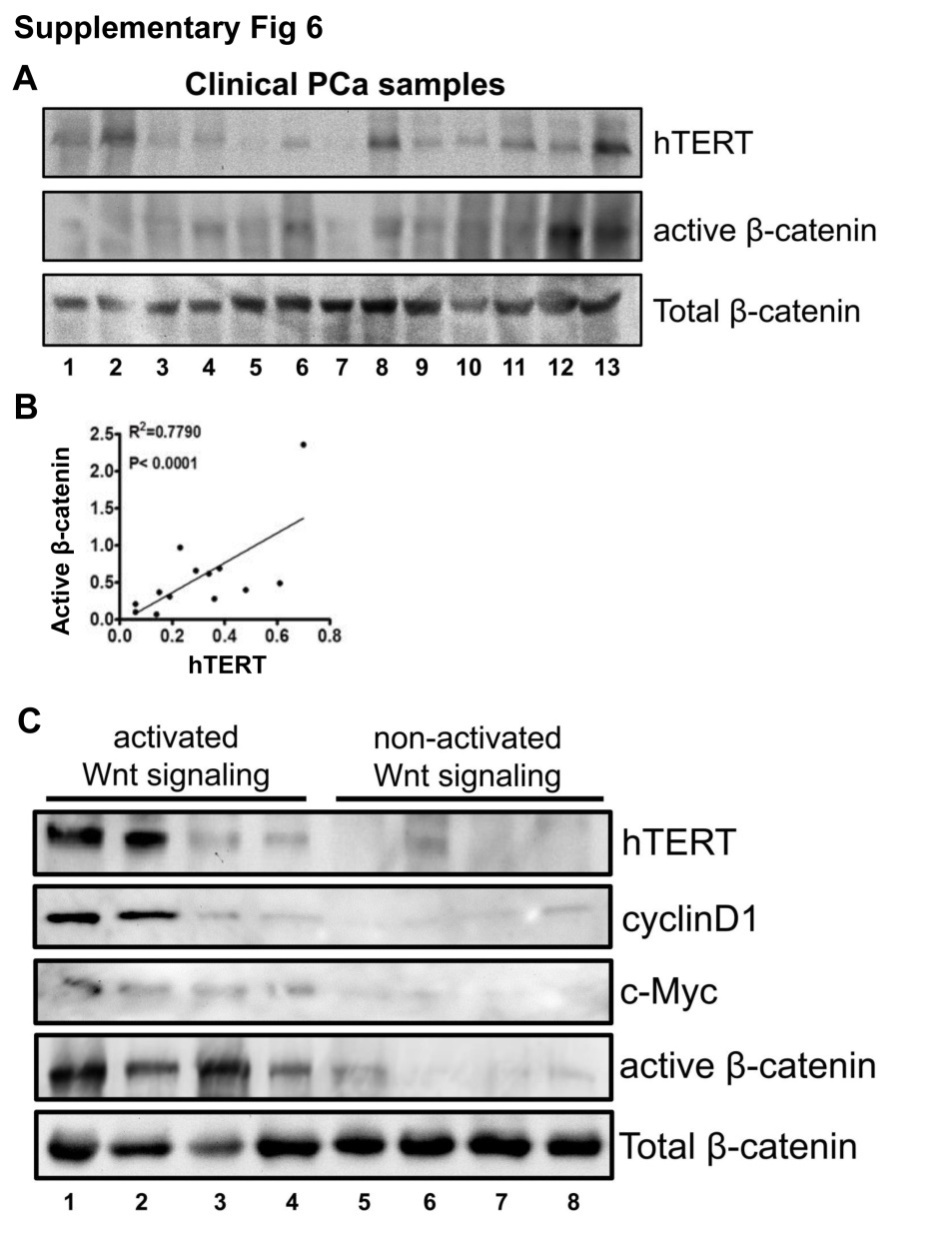


**Supplementary Fig 6. PCa tissues with elevated WNT signaling activation express higher level of hTERT**

(A) Immunoblotting analysis shows that expression levels of hTERT are positively correlated with active form of β-catenin in a total of 13 cases of PCa specimens. Total β-catenin protein levels were normalized as an internal control. Representative immunoblotting pictures were shown.

(B) A linear relationship between hTERT and active β-catenin protein was evaluated with a regression analysis.

(C) Immunoblotting analysis shows that PCa tissues associated with higher level of active β-catenin and other WNT downstream targets c-Myc and cyclinD1 exhibited increased hTERT expression. Over 30 cases of clinical samples were carefully determined and representative immunoblotting pictures were shown.
