# Supplementary material for: WNT/β-Catenin Directs Self-Renewal Symmetric Cell Division of hTERThigh Prostate Cancer Stem Cells
Source: Oxford University Press journal article supplement (doi:10.1158/0008-5472.can-16-1887), 2017-02-16
Supplement: 00085472can161887-sup-168871_2_supp_3818930_tjltyc.docx [file 00085472can161887-sup-168871_2_supp_3818930_tjltyc.docx]

**Supplementary Fig 7**


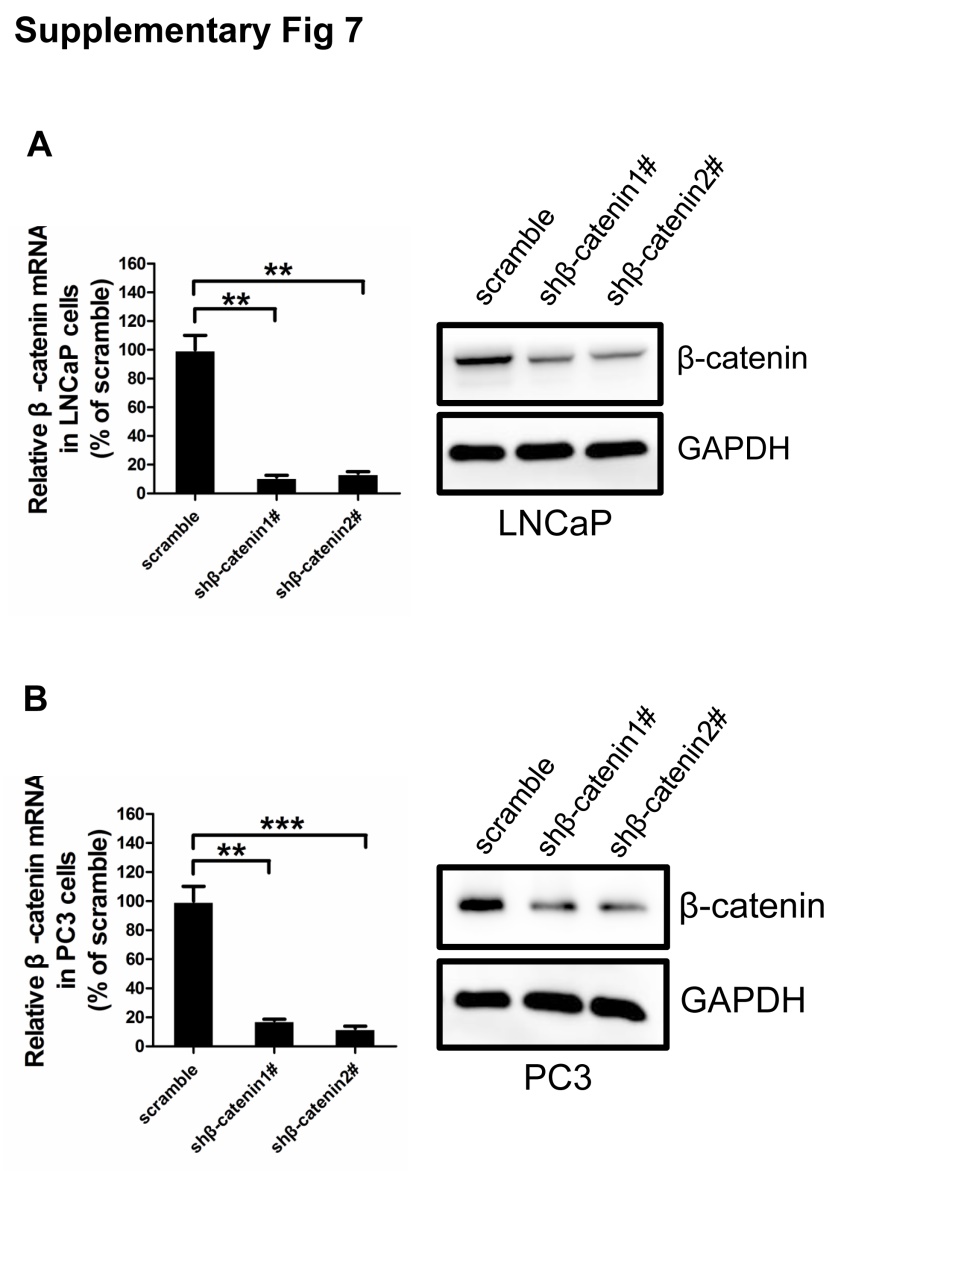


**Supplementary Fig 7. Validation of β-catenin knockdown efficiency in PCa cells**

(A, B) Two independent shRNA targeting human β-catenin were transfected into LNCaP (A) or PC3 (B) cells.

shβ-catenin 1#: 5'-AAACTACTGTGGACCACAAGC-3'

shβ-catenin 2#: 5'-GCAGCTGGAATTCTTTCTAAC-3'

q-PCR and immunoblotting results show efficient β-catenin knockdown in both cell lines. (Student’s *t*-test, ***P＜0.001,**P＜0.01, error bars = s.e.m.)
