# Supplementary material for: WNT/β-Catenin Directs Self-Renewal Symmetric Cell Division of hTERThigh Prostate Cancer Stem Cells
Source: Oxford University Press journal article supplement (doi:10.1158/0008-5472.can-16-1887), 2017-02-16
Supplement: 00085472can161887-sup-168871_2_supp_3818931_gjltzb.docx [file 00085472can161887-sup-168871_2_supp_3818931_gjltzb.docx]

**Supplementary Fig 8**

**
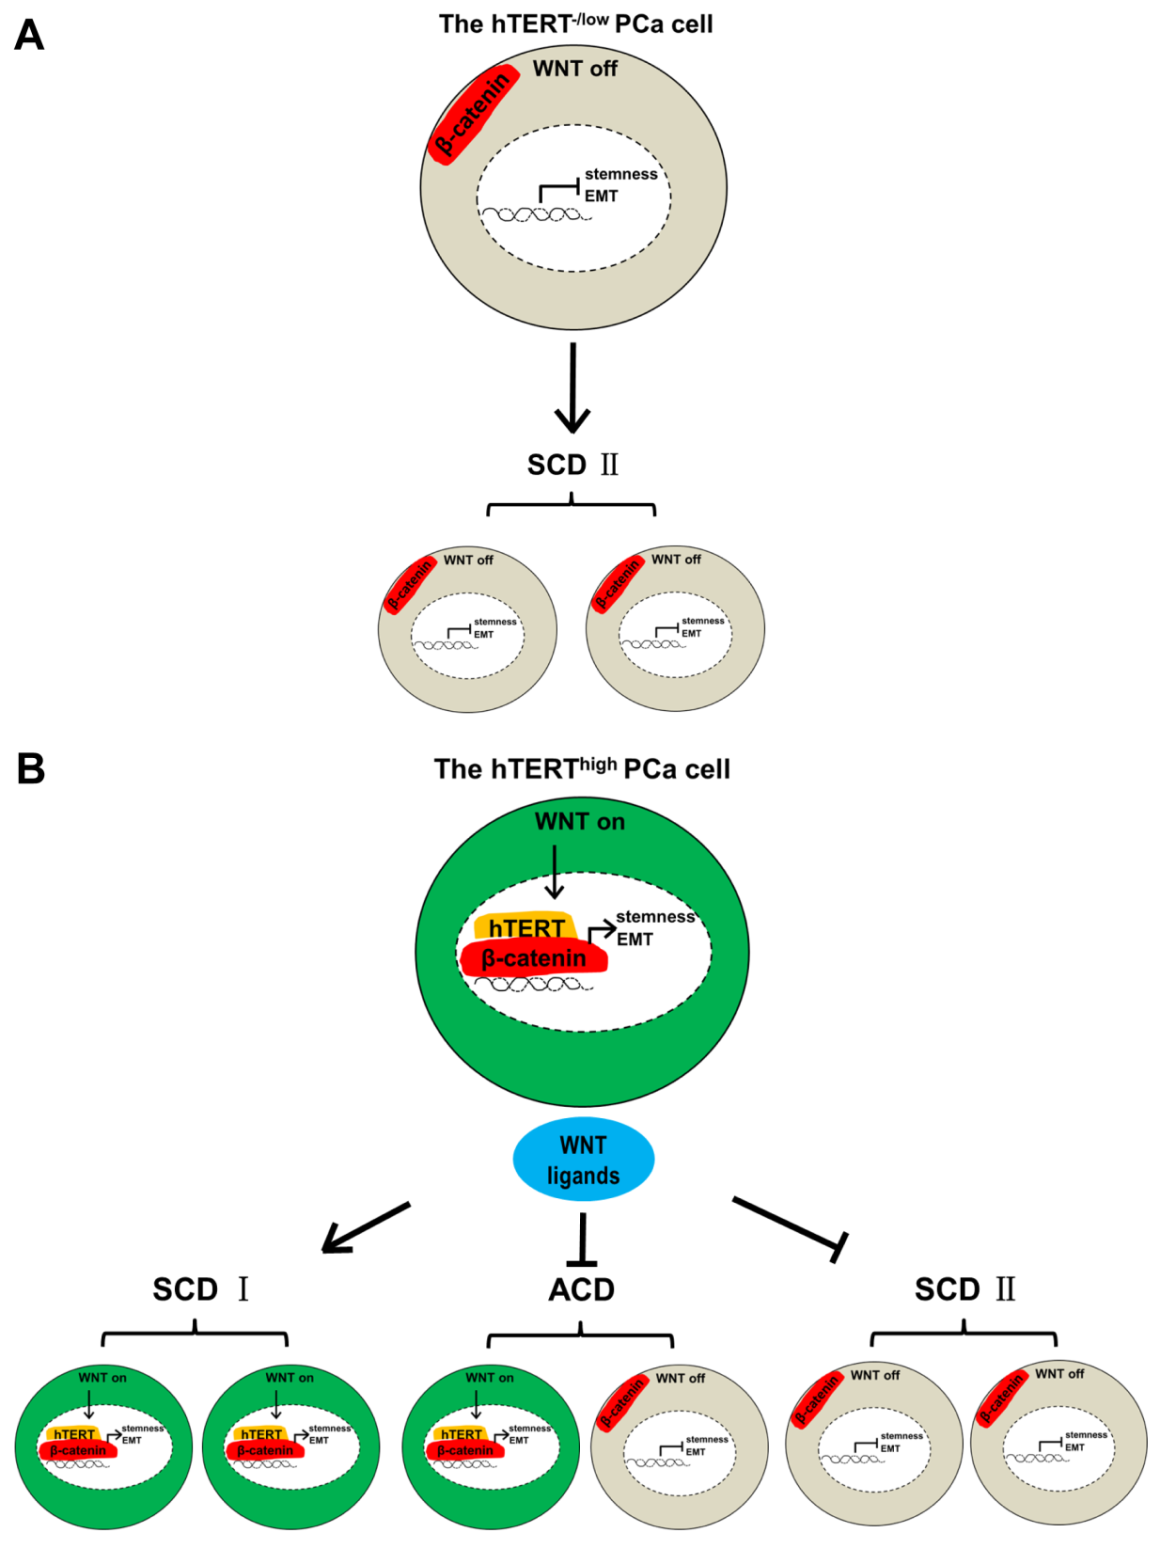
**

**Supplementary Fig 8. Schematic model of hTERThigh PCSCs cell division modes modulated by WNT/β-catenin**

(A) hTERT-/low PCa cells, with cell membrane localized β-catenin expression and dampened WNT signaling, mostly undergo SCD to produce two identical hTERT-/low daughter cells. (B) hTERThigh PCSCs exhibit greater WNT/β-catenin pathway activation and undergo three distinct types of cell division: self-renewing SCD I, differentiating SCD II, and ACD. In SCD I, hTERT and nuclear β-catenin equally distribute into the daughter cells. In SCD II, both daughter cells exhibit undetectable hTERT expression and cell membrane localized β-catenin. In ACD, an hTERThigh PCSC gives rise to one daughter cell with high level of hTERT and nuclear β-catenin, the other with undetectable hTERT and cell membrane localized β-catenin. Canonical WNT ligands, like WNT3a and WNT16b, significantly increases self-renewing SCD I, meanwhile inhibits differentiating SCD II, and ACD.
